# Supplementary material for: Investigating the Antibacterial Activity and Safety of Zinc Oxide Nanoparticles versus a Commercial Alcohol-Based Hand-Sanitizer: Can Zinc Oxide Nanoparticles Be Useful for Hand Sanitation?
Source: MDPI journal article supplement (doi:10.3390/antibiotics11111606), 2022-11-11
Supplement: s1 [file s1]

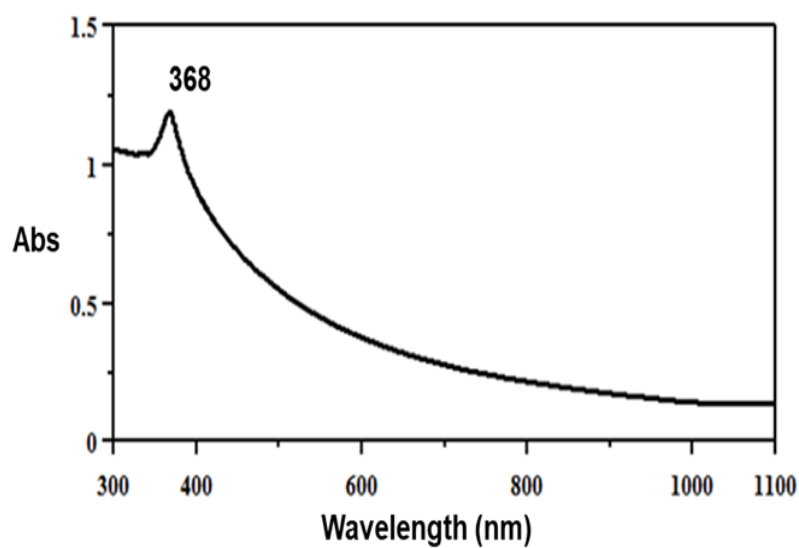

Figure S1. UV-visible absorbance spectroscopy of ZnO-NPs.

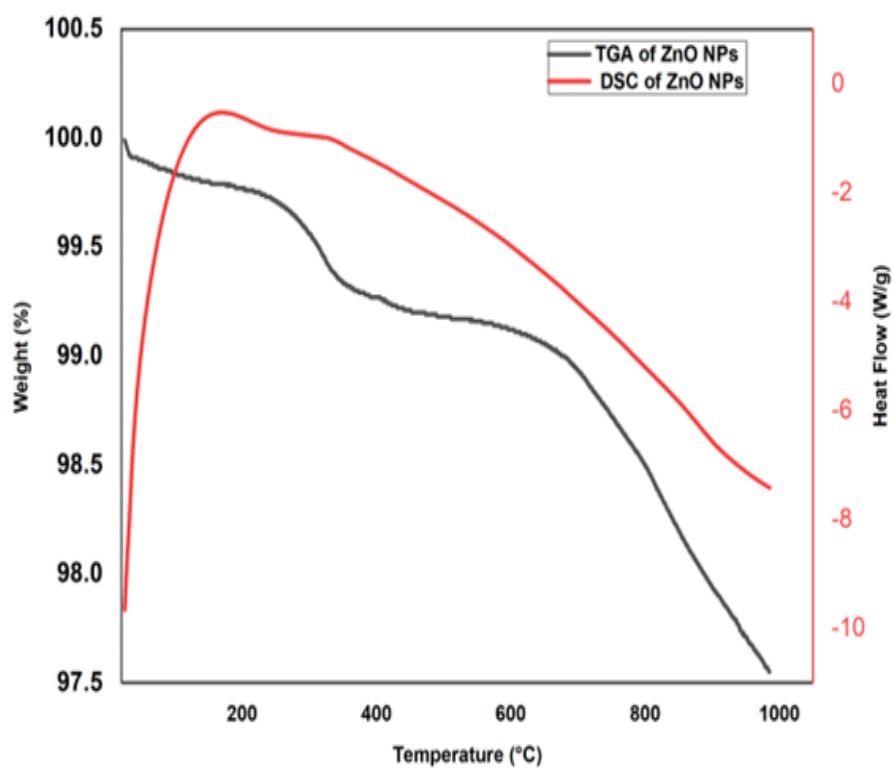

Figure S2. DSC-TGA thermogram of ZnO-NPs.

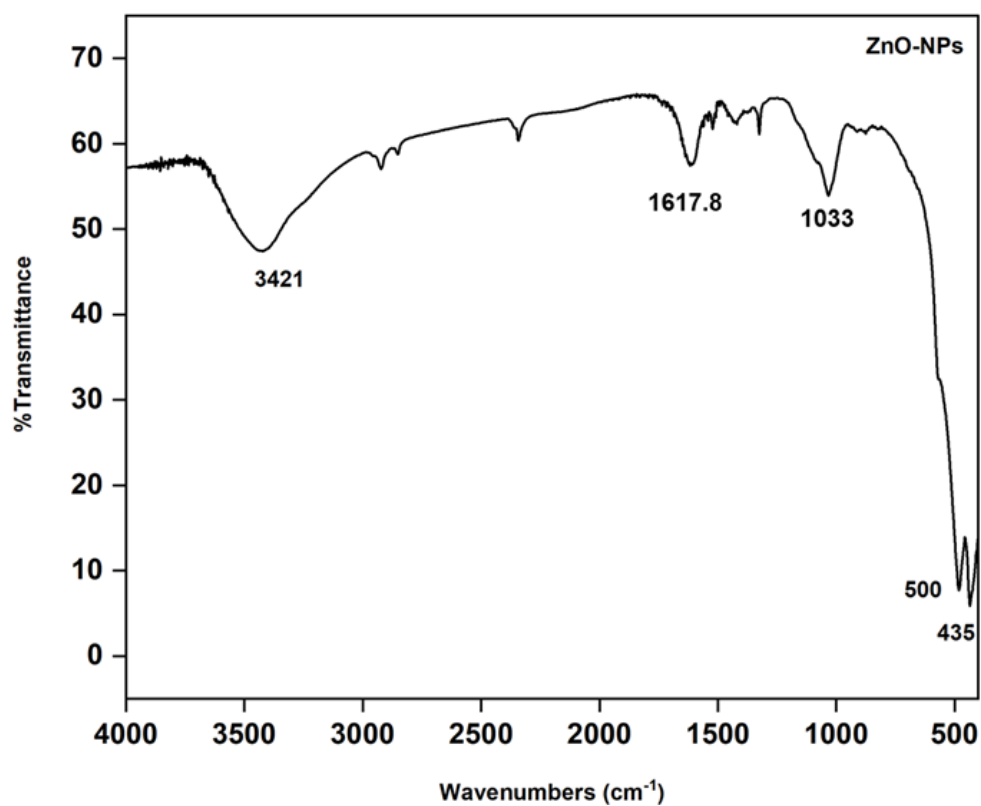

Figure S3. FTIR spectrum of synthesized ZnO-NPs.

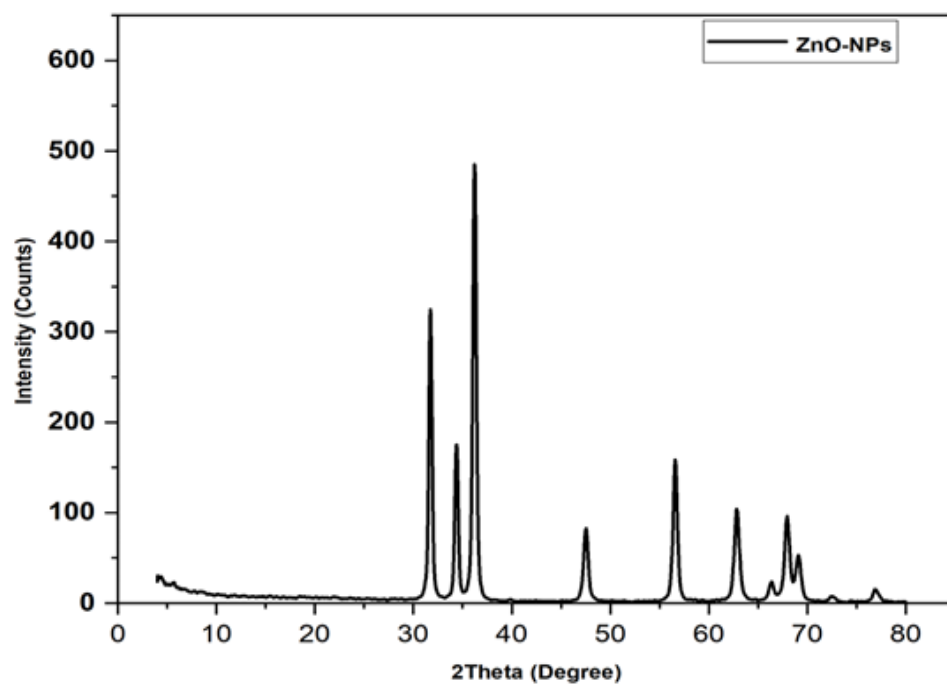

Figure S4. X-ray diffraction of synthesized ZnO-NPs.

**Table S1: Stability of ZnO-NPs prepared under different Temperature and PVP concentration, results are average of three independent experiments, each involved a triplicate**

| PVP concentration- Day of measurement after preparation      | *Preparation Condition       |                                     |                              |
|--------------------------------------------------------------|------------------------------|-------------------------------------|------------------------------|
|                                                              | Particle Size (Dnm $\pm$ SD) | Polydispersity Index (PDI) $\pm$ SD | Zeta Potential (mV $\pm$ SD) |
| 3% w/v – Day 0                                               | 361.7 $\pm$ 2.08             | 0.302 $\pm$ 0.008                   | -18.2 $\pm$ 0.14             |
| 3% w/v – Day 1                                               | 378.7 $\pm$ 2.25             | 0.323 $\pm$ 0.03                    | -14.93 $\pm$ 0.5             |
| 3% w/v – Day 2                                               | 445.3 $\pm$ 13.5             | 0.37 $\pm$ 0.043                    | -11.6 $\pm$ 0.11             |
| 3% w/v – Day 3                                               | 587.4 $\pm$ 46               | 0.37 $\pm$ 0.019                    | -7.4 $\pm$ 0.25              |
| 10% w/v - Day 0                                              | 349.6 $\pm$ 11               | 0.311 $\pm$ 0.006                   | -10.6 $\pm$ 0.2              |
| 10% w/v - Day 1                                              | 358 $\pm$ 14.3               | 0.345 $\pm$ 0.045                   | -13.17 $\pm$ 0.153           |
| 10% w/v - Day 2                                              | 503 $\pm$ 6                  | 0.29 $\pm$ 0.025                    | -13.6 $\pm$ 0.47             |
| 10% w/v - Day 3                                              | 501.6 $\pm$ 4.56             | 0.288 $\pm$ 0.025                   | -13.63 $\pm$ 0.47            |
| *Preparation Condition; pH=8, Temperature = 70°C, RPM = 1500 |                              |                                     |                              |

| <b>Table S2: Antimicrobial susceptibility profile of <i>S. aureus</i> ATCC 12600</b> |                       |
|--------------------------------------------------------------------------------------|-----------------------|
| <b>Antibiotics</b>                                                                   | <b>Susceptibility</b> |
| Gentamicin (GN)                                                                      | S                     |
| Tobramycin (TOB)                                                                     | S                     |
| Amikacin (AK)                                                                        | S                     |
| Oxacillin (OXA)                                                                      | S                     |
| Amoxicillin/clavulanate (AMC)                                                        | S                     |
| Piperacillin (PRL)                                                                   | S                     |
| Cefotaxime (CTX)                                                                     | R                     |
| Ceftriaxone (CRO)                                                                    | S                     |
| Imipenem (IMP)                                                                       | R                     |
| Meropenem (MEM)                                                                      | R                     |
| Ciprofloxacin (CIP)                                                                  | S                     |
| Levofloxacin (LEV)                                                                   | S                     |
| Vancomycin (VA)                                                                      | S                     |

| <b>Table S3: Antimicrobial susceptibility profile of MRSA ATCC 25923</b> |                       |
|--------------------------------------------------------------------------|-----------------------|
| <b>Antibiotics</b>                                                       | <b>Susceptibility</b> |
| Gentamicin (GN)                                                          | R                     |
| Tobramycin (TOB)                                                         | R                     |
| Amikacin (AK)                                                            | R                     |
| Oxacillin (OXA)                                                          | R                     |
| Amoxicillin/clavulanate (AMC)                                            | R                     |
| Piperacillin (PRL)                                                       | S                     |
| Cefotaxime (CTX)                                                         | R                     |
| Ceftriaxone (CRO)                                                        | R                     |
| Cefoxitin (FOX)                                                          | S                     |
| Imipenem (IMP)                                                           | R                     |
| Meropenem (MEM)                                                          | R                     |
| Ciprofloxacin (CIP)                                                      | R                     |
| Levofloxacin (LEV)                                                       | S                     |
| Vancomycin (VA)                                                          | S                     |

| <b>Table S4: Antimicrobial susceptibility profile of <i>K. pneumoniae</i> ATCC 10031</b> |                       |
|------------------------------------------------------------------------------------------|-----------------------|
| <b>Antibiotics</b>                                                                       | <b>Susceptibility</b> |
| Gentamicin (GN)                                                                          | S                     |
| Tobramycin (TOB)                                                                         | S                     |
| Amikacin (AK)                                                                            | S                     |
| Amoxicillin/clavulanate (AMC)                                                            | R                     |
| Piperacillin (PRL)                                                                       | S                     |
| Cefotaxime (CTX)                                                                         | R                     |
| Ceftriaxone (CRO)                                                                        | R                     |
| Imipenem (IMP)                                                                           | S                     |
| Meropenem (MEM)                                                                          | S                     |
| Ciprofloxacin (CIP)                                                                      | R                     |
| Levofloxacin (LEV)                                                                       | S                     |

| <b>Table S5: Antimicrobial susceptibility profile of <i>Acinetobacter baumannii</i> ATCC 15308</b> |                       |
|----------------------------------------------------------------------------------------------------|-----------------------|
| <b>Antibiotics</b>                                                                                 | <b>Susceptibility</b> |
| Gentamicin (GN)                                                                                    | R                     |
| Tobramycin (TOB)                                                                                   | S                     |
| Amikacin (AK)                                                                                      | S                     |
| Amoxicillin/clavulanate (AMC)                                                                      | R                     |
| Piperacillin (PRL)                                                                                 | S                     |
| Cefotaxime (CTX)                                                                                   | R                     |
| Ceftriaxone (CRO)                                                                                  | S                     |
| Imipenem (IMP)                                                                                     | R                     |
| Meropenem (MEM)                                                                                    | R                     |
| Ciprofloxacin (CIP)                                                                                | R                     |
| Levofloxacin (LEV)                                                                                 | S                     |
